# Supplementary material for: Hospitalization Rates and Comorbidities in Patients with Progressive Supranuclear Palsy in Germany from 2010 to 2017
Source: J Clin Med. 2020 Jul 31;9(8):2454. doi: 10.3390/jcm9082454 (PMC7465231; doi:10.3390/jcm9082454)
Supplement: Supplementary file 1 [file jcm-09-02454-s001.pdf]

**Table S1.** Overview of the analyzed statistical variables. G23.-: Other degenerative diseases of the basal ganglia, G23.1: Steele–Richardson–Olzewski syndrome.

| Analyzed Variables                                                                 | Years     |
|------------------------------------------------------------------------------------|-----------|
| Development of inpatient numbers with main diagnosis G23.-                         | 2010-2017 |
| Inpatients number with main diagnosis G23.-                                        | 2017      |
| Distribution of subcategories of main diagnosis G23.-                              | 2010-2017 |
| Annual disease distribution changes of inpatient numbers with main diagnosis G23.- | 2010-2017 |
| Distribution of main diagnosis G23.1 according to gender                           | 2010-2017 |
| Distribution of main diagnosis G23.1 according to age                              | 2010-2017 |
| Comorbidities main diagnosis G23.1                                                 | 2017      |

**Table S2.** Prevalence of various comorbidities at admission in relation to the diagnosis G23.1 and G20.- in 2017. G.20.-: Primary Parkinson Syndrome. G23.1: Steele–Richardson–Olzewski syndrome.

| Comorbidity (ICD-10)                                                                        | Main<br>Diagnosis<br>G23.1 | Main<br>Diagnosis<br>G20.- | Diff.-<br>Points |
|---------------------------------------------------------------------------------------------|----------------------------|----------------------------|------------------|
| Essential hypertension (I10)                                                                | 53.86%                     | 49.17%                     | 4.69%            |
| Speech disorders (R47)                                                                      | 38.50%                     | 22.92%                     | 15.59%           |
| Problems related to long-term care (Z74)                                                    | 31.67%                     | 30.65%                     | 1.02%            |
| Disorders of gait and mobility (R26)                                                        | 30.06%                     | 25.98%                     | 4.08%            |
| Dysphagia (R13)                                                                             | 26.53%                     | 11.66%                     | 14.86%           |
| Other diseases of the urinary system (N39)                                                  | 23.39%                     | 21.74%                     | 1.65%            |
| Type 2 diabetes (E11)                                                                       | 18.65%                     | 16.31%                     | 2.34%            |
| Other symptoms of the nervous system and the musculoskeletal system (R29)                   | 16.64%                     | 13.28%                     | 3.36%            |
| Disorders of lipoprotein metabolism and other lipidemias (E78)                              | 13.99%                     | 12.85%                     | 1.14%            |
| Other mental disorders resulting from brain damage or dysfunction or physical illness (F06) | 13.67%                     | 18.20%                     | -4.54%           |
| Motor dysfunctions (R32)                                                                    | 12.94%                     | 23.75%                     | -10.81%          |
| Unspecified dementia (F03)                                                                  | 9.89%                      | 2.89%                      | 7.00%            |
| Dementia in other diseases (F02)                                                            | 7.23%                      | 19.20%                     | -11.96%          |
| Other extrapyramidal diseases and movement disorders (G25)                                  | 4.26%                      | 11.27%                     | -7.01%           |

**Table S3.** Ten most common main diagnoses with G23.1 as secondary diagnosis in 2017. G23.1: Steele–Richardson–Olzewski syndrome.

| Comorbidity (ICD-10)                                  | Main<br>Diagnosis<br>2017 (cases) | Diagnosis G23.1<br>2017 (cases) | Rate  |
|-------------------------------------------------------|-----------------------------------|---------------------------------|-------|
| Pneumonia caused by solid and liquid substances (J69) | 33600                             | 99                              | 0.29% |
| Primary Parkinson's disease (G20)                     | 45370                             | 75                              | 0.17% |
| Glaucoma (H40)                                        | 74628                             | 49                              | 0.07% |
| Pneumonia, pathogen not specified (J18)               | 237839                            | 45                              | 0.02% |
| Hypovolemia (E86)                                     | 125835                            | 44                              | 0.03% |
| Intracranial injury (S06)                             | 282838                            | 42                              | 0.01% |
| Other diseases of the urinary system (N39)            | 152733                            | 39                              | 0.03% |
| Femur fracture (S72)                                  | 188000                            | 38                              | 0.02% |

|                |        |    |       |
|----------------|--------|----|-------|
| Epilepsy (G40) | 146861 | 31 | 0.02% |
| Stroke (I63)   | 258927 | 31 | 0.01% |

**Table S4.** Ten most common main diagnoses with G23.- as secondary diagnosis in 2017. G23.-: Other degenerative diseases of the basal ganglia.

| Comorbidity (ICD-10)                                     | Main<br>Diagnosis<br>2017 (cases) | Diagnosis G23.-<br>2017 (cases) | Rate  |
|----------------------------------------------------------|-----------------------------------|---------------------------------|-------|
| Primary Parkinson's disease (G20)                        | 45370                             | 190                             | 0,42% |
| Pneumonia caused by solid and liquid<br>substances (J69) | 33600                             | 127                             | 0,38% |
| Stroke (I63)                                             | 258927                            | 98                              | 0,04% |
| Epilepsy (G40)                                           | 146861                            | 81                              | 0,06% |
| Hypovolemia (E86)                                        | 125835                            | 79                              | 0,06% |
| Pneumonia, pathogen not specified (J18)                  | 237839                            | 79                              | 0,03% |
| Intracranial injury (S06)                                | 282838                            | 70                              | 0,02% |
| Femur fracture (S72)                                     | 188000                            | 65                              | 0,03% |
| Other diseases of the urinary system (N39)               | 152733                            | 63                              | 0,04% |
| Other sepsis (A41)                                       | 122574                            | 51                              | 0,04% |
